# Supplementary material for: Monitoring of Ebola Virus Makona Evolution through Establishment of Advanced Genomic Capability in Liberia
Source: PubMed Central journal article supplement (PMC4816332; doi:10.3201/eid2107.150522), 2015-07
Supplement: 15-0522-Techapp-s1.pdf [file 15-0522-Techapp-s1.pdf]

# Monitoring of Ebola Virus Makona Evolution through Establishment of Advanced Genomic Capability in Liberia

## Technical Appendix 1

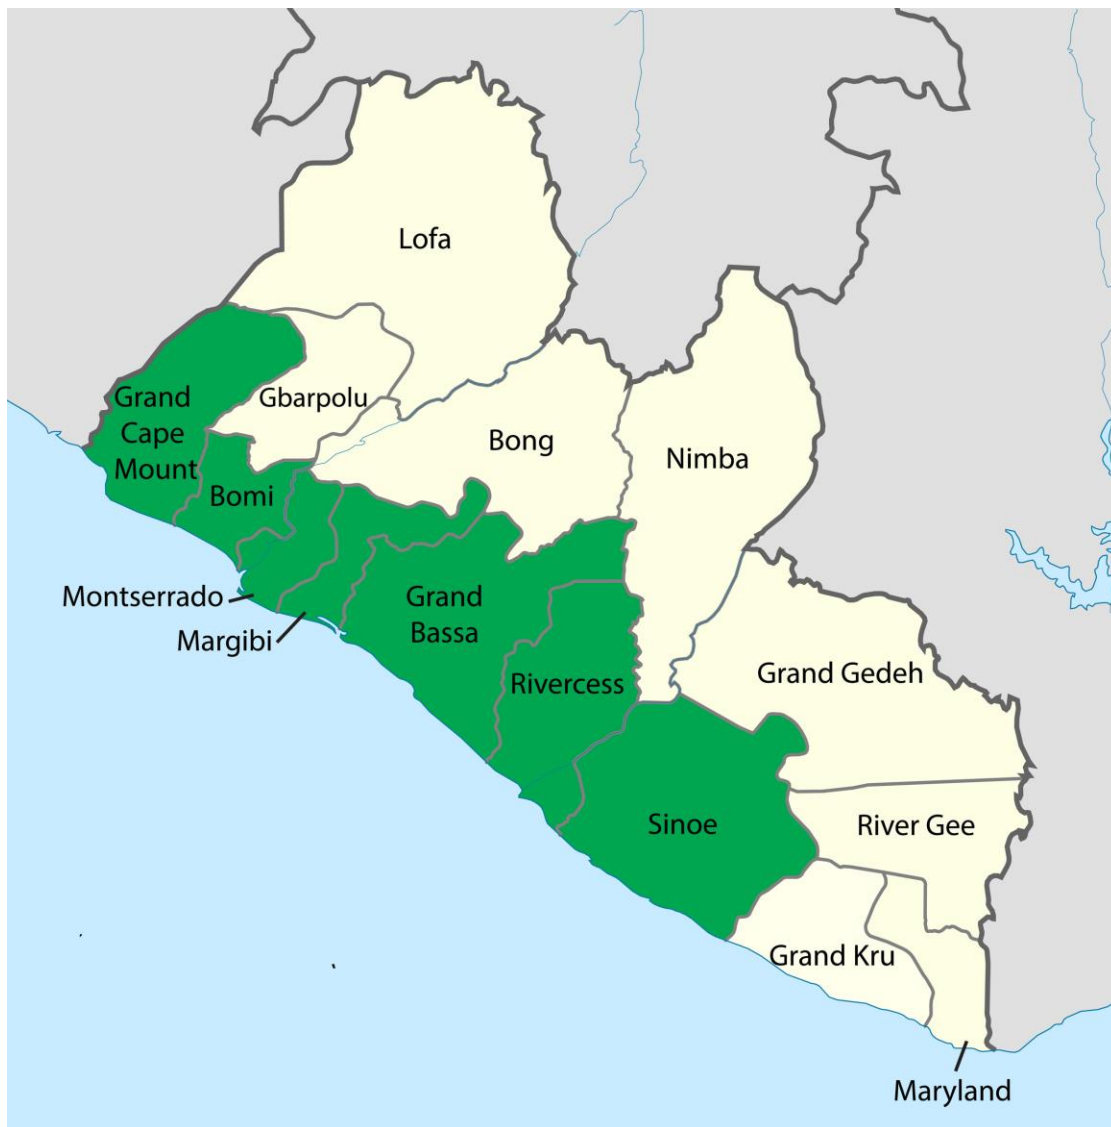

**Technical Appendix 1 Figure 1.** Map of Liberia counties showing the 25 Ebola virus (EBOV) isolates described in this study. Samples were collected from persons in 7 coastal Liberian counties (highlighted in green) during September 2014–February 2015.



Technical Appendix 1. Diagnostic probe information, used for Figure 2 and Supplementary Figure S4, highlighting mutated probe positions.

| Figure references     | Author           | Gene  | Name                  | Forward                               | Reverse                                    | Probe                                | Reference                                                                                              |
|-----------------------|------------------|-------|-----------------------|---------------------------------------|--------------------------------------------|--------------------------------------|--------------------------------------------------------------------------------------------------------|
| Fig. 2:<br>Kulesh-MGB | Trombley,<br>A   | NP    | Kulesh-<br>MGB        | <b>TCTGACATGGATTACCACAAGATC</b>       | <b>GGATGACTCTTTGCCGAACAA TC</b>            | <b>AGGTCTGTCCGTTCAA</b>              | Am J Trop Med Hyg. 2010 May;82(5):954- 60. doi: 10.4269/ajtmh.2010.09-0636.                            |
| Fig. 2:<br>Kulesh-TM  | Trombley,<br>A   | GP    | Kulesh-<br>TM         | <b>TTTTCAATCCTCAACCGTAAGGC</b>        | <b>CAGTCCGGTCCCAGAATGTG</b>                | <b>GCAGCGATGGGG CCG CACATG</b>       | Am J Trop Med Hyg. 2010 May;82(5):954-60. doi: 10.4269/ajtmh.2010.09-0636.                             |
| Fig. S4 #1            | Sanchez,<br>A    | NP    | ZAI-NP                | <b>GGACCGCCAAGGT AAAAAATGA</b>        | <b>GCATATTGTTGGAGTTGCTTCTCAGC</b>          |                                      | J Infect Dis. 1999 Feb;179 Suppl 1:S164- 9.                                                            |
| Fig. S4 #2            | Towner, J.       | NP    | EboZNP                | <b>TGG AAA AAAACATTAAGAGAACACTTGC</b> | <b>AGGAGAG A AACTGACCGGC A T</b>           | <b>CATGCCGGAAGAGGAG AC AACTGAAGC</b> | Biosecur. Bioterror. 9, 361–371 (2011)                                                                 |
| Fig. S4 #3            | Weidmann,<br>M.  | NP    | ENZ                   | <b>ATGATGGA AGCTACGGCG</b>            | <b>AGGACCAAGTCATCTGGTGC</b>                |                                      | J. Clin. Virol. 30, 94–99 (2004).                                                                      |
| Fig. S4 #4            | Trombley,<br>A   | NP    | Ebola<br>MGB-<br>EBOV | <b>ACT CAGAGAGGC TGCCACTG</b>         | <b>CAAGTCCAAGATGGTCAAGTTC G</b>            |                                      | Am J Trop Med Hyg. 2010 May;82(5):954- 60. doi: 10.4269/ajtmh.2010.09-0636.                            |
| Fig. S4 #5            | Gire, SK         | VP24* | KGH                   | <b>GTCGTTCC AACAATCGAGCG</b>          | <b>CGTCCCGTAGCTTTRGCCAT</b>                |                                      | Science. 2014 Sep 12;345(6202):1369- 72. doi: 10.1126/science.1259657. Epub 2014 Aug 28.               |
| Fig. S4 #6            | Sanchez,<br>A    | GP    | EBO-GP                | <b>AATGGGCTGAAAA TGCTACAATC</b>       | <b>TTTTTTTAGTTTCCC A GAAGGCCACT</b>        |                                      | J Infect Dis. 1999 Feb;179 Suppl 1:S164- 9.                                                            |
| Fig. S4 #7            | Gunther,<br>S.   | GP    | EBOGP                 | <b>TGGGCTGAAAAYTGCTACAATC</b>         | <b>CTTTGTGMACATASC GG CAC</b>              | <b>CTACCAGCAGCGCCAG ACGG</b>         | Antiviral Res. 2004 Sep;63(3):209-15.                                                                  |
| Fig. S4 #8            | Morvan, J.<br>M. | GP    | EBO1/2                | <b>TGGGTAATYATCCTYTTCCA</b>           | <b>ACGACACCTTCAGCRAAAGT</b>                |                                      | Microbes Infect. 1, 1193–1201 (1999).                                                                  |
| Fig. S4 #9            | Strong,<br>J.E.  | GP    | ZebovG<br>P           | <b>GGCCAACGA GACGACTCAA</b>           | <b>AAAGGT GCG TAGCTCAGTTGTG</b>            |                                      | Proc Natl Acad Sci U S A. 2008 Nov 18;105(46):17982- 7. doi: 10.1073/pnas.0809698105. Epub 2008 Nov 3. |
| Fig. S4 #10           | Morvan, J.<br>M. | GP    | EBO3/4                | <b>GTTTGTGCGKACAACTGTC</b>            | <b>TGGAARGCWAAGTCWCCGG</b>                 |                                      | Microbes Infect. 1, 1193–1201 (1999).                                                                  |
| Fig. S4 #11           | Leroy, E         | L     | modified<br>Filo AB   | <b>ATCGGAATTTTCTTTCTCATTGAAAGA</b>    | <b>ATG TGGTGG GTTATAATAACTACTGACATGCAT</b> |                                      | J Med Virol. 2000 Apr;60(4):463- 7.                                                                    |
| Fig. S4 #12           | Sanchez,<br>A    | L     | Filo AB               | <b>ATCGGAATTTTCTTTCTCATT*</b>         | <b>ATG TGGTGG GTTATAATAACTACTGACATG</b>    |                                      | J Infect Dis. 1999 Feb;179 Suppl 1:S164- 9.                                                            |
| Fig. S4 #13           | Panning,<br>M    | L     |                       | <b>AAGCATTTCCTAGCAATATGATGGT</b>      | <b>ATG TGGTGG GTTATAATAACTACTGACATG</b>    | <b>CC AAAATCATCACTIGT GTGGTGCCA</b>  | J Infect Dis. 2007 Nov 15;196 Suppl 2:S199-204.                                                        |
| Fig. S4 #14           | Palacios,<br>G.  | L     |                       | <b>AACACCGGGTCTTAATTCTTATATCAA</b>    | <b>GGTGGTAAAATCCCATAG TAGTCTTT</b>         |                                      | Emerg Infect Dis. 2006 Apr;12(4):692- 5.                                                               |
| Fig. S4 #15           | Zhai, J.         | L     |                       | <b>TATTTTCCAT TCAAAAACACTGGG</b>      | <b>GCTTCACAAAGTGTTTGAACATT</b>             |                                      | J Clin Microbiol. 2007 Jan;45(1):224- 6. Epub 2006 Nov 1.                                              |
| Fig. S4 #16           | Grard, G.        | L     | PanFilo-<br>L1/2      | <b>ATMGRAAYTTTTCYTTYTCWYT</b>         | <b>TG WGGHGGRYTATAAWARTCACTDACAT</b>       |                                      | J. Infect. Dis. 204 (suppl. 3), S776–S784 (2011).                                                      |

| Figure references | Author    | Gene | Name         | Forward                       | Reverse                      | Probe | Reference                                         |
|-------------------|-----------|------|--------------|-------------------------------|------------------------------|-------|---------------------------------------------------|
| Fig. S4 #17       | Grard, G. | L    | PanFilo-L3/4 | GCNAARGCMTTYCCHAGYAAAYATGATGG | ATAAWARTCACTDACAATGCATRTARCA |       | J. Infect. Dis. 204 (suppl. 3), S776–S784 (2011). |
| Fig. S4 #18       |           | L    | GAB-1        | GAATGTAGGTAGAACAATTCGG        | GCATATAACACTGTGGGATTG        |       |                                                   |
